# Supplementary material for: Lipid production via simultaneous conversion of glucose and xylose by a novel yeast, Cystobasidium iriomotense
Source: PubMed Central journal article supplement (PMC6135397; doi:10.1371/journal.pone.0202164), 2018-09-12
Supplement: pone.0202164.s001.pdf [file pone.0202164.s001.pdf]

S1 Table. GC data

|                  | C14:0                            | C16:0   | C16:1   | C18:0   | C18:1   | C18:2   | C18:3   | C22:0   | C24:0   |         |
|------------------|----------------------------------|---------|---------|---------|---------|---------|---------|---------|---------|---------|
| <b>IPM32-16</b>  | 1                                | 0.00402 | 0.19168 | 0.00111 | 0.05540 | 0.50156 | 0.16560 | 0.00282 | 0.00262 | 0.01464 |
|                  | 2                                | 0.00385 | 0.18545 | 0.00110 | 0.05189 | 0.48266 | 0.16028 | 0.00088 | 0.00235 | 0.01424 |
|                  | 3                                | 0.00341 | 0.17874 | 0.00095 | 0.05536 | 0.45782 | 0.17243 | 0.00092 | 0.00257 | 0.01579 |
|                  | Average of three assays [g/L]    | 0.00376 | 0.18529 | 0.00105 | 0.05421 | 0.48068 | 0.16610 | 0.00154 | 0.00251 | 0.01489 |
|                  | Relative standard deviations [%] | 8.26    | 3.49    | 8.55    | 3.72    | 4.56    | 3.66    | 72.00   | 5.72    | 5.40    |
| <b>ISM28-8s</b>  | 1                                | 0.00304 | 0.18326 | 0.00025 | 0.27044 | 0.47685 | 0.11349 | 0.00125 | 0.00774 | 0.01671 |
|                  | 2                                | 0.00288 | 0.18366 | 0.00033 | 0.27028 | 0.46905 | 0.11697 | 0.00115 | 0.00778 | 0.01637 |
|                  | 3                                | 0.00312 | 0.19833 | 0.00039 | 0.28049 | 0.50597 | 0.11485 | 0.00137 | 0.00777 | 0.01830 |
|                  | Average of three assays [g/L]    | 0.00301 | 0.18842 | 0.00032 | 0.27374 | 0.48396 | 0.11510 | 0.00126 | 0.00776 | 0.01712 |
|                  | Relative standard deviations [%] | 4.14    | 4.56    | 21.73   | 2.14    | 4.02    | 1.52    | 8.51    | 0.28    | 6.00    |
| <b>IPM46-17</b>  | 1                                | 0.00911 | 0.34898 | 0.00165 | 0.09298 | 0.42249 | 0.25775 | 0.00187 | 0.00331 | 0.01287 |
|                  | 2                                | 0.01046 | 0.39873 | 0.00173 | 0.10867 | 0.47925 | 0.29624 | 0.00230 | 0.00402 | 0.01592 |
|                  | 3                                | 0.00887 | 0.36663 | 0.00151 | 0.09772 | 0.43692 | 0.28428 | 0.00202 | 0.00354 | 0.01468 |
|                  | Average of three assays [g/L]    | 0.00948 | 0.37145 | 0.00163 | 0.09979 | 0.44622 | 0.27942 | 0.00206 | 0.00362 | 0.01449 |
|                  | Relative standard deviations [%] | 9.06    | 6.79    | 6.86    | 8.06    | 6.61    | 7.05    | 10.45   | 9.98    | 10.60   |
| <b>JCM 10954</b> | 1                                | 0       | 0.02399 | 0.00021 | 0.01093 | 0.05442 | 0.09571 | 0.00195 | 0.00064 | 0.00402 |
|                  | 2                                | 0       | 0.02137 | 0.00022 | 0.00989 | 0.05066 | 0.09078 | 0.00193 | 0.00047 | 0.00342 |
|                  | 3                                | 0       | 0.02291 | 0.00024 | 0.01113 | 0.05686 | 0.09519 | 0.00206 | 0.00046 | 0.00391 |
|                  | Average of three assays [g/L]    | 0       | 0.02276 | 0.00022 | 0.01065 | 0.05398 | 0.09389 | 0.00198 | 0.00052 | 0.00379 |
|                  | Relative standard deviations [%] | -       | 5.80    | 6.70    | 6.25    | 5.79    | 2.89    | 3.49    | 19.67   | 8.47    |
